# Supplementary material for: Insects as a sustainable source of emerging proteins and their processing to obtain bioactive compounds: an updated review
Source: Royal Society of Chemistry journal article supplement (doi:10.1039/d3fb00097d), 2023-11-07
Supplement: d3fb00097d1.xlsx [file d3fb00097d1.xlsx]

## Sheet: Planilha1
Table S1. Different approaches adopted for obtaining bioactive peptides from insect proteins.
Insect specie	Treatment	Enzymes	Activity	Reference
Spodoptera littoralis	Simulated gastrointestinal digestion	Pepsin	ACE inhibition	(Vercruysse et al., 2008)
		Trypsin
		α-chymotrypsin
Spodoptera littoralis	Hydrolysis	Thermolysin	Antioxidant	(Vercruysse et al., 2009)
		Alcalase	ACE inhibition
	Simulated gastrointestinal digestion	Pepsin
		Trypsin
		α-chymotrypsin
	Digestion with mucosal peptidases	Mucosal peptidases
Spodoptera littoralis	Simulated gastrointestinal digestion	Pepsin	ACE inhibition	(Vercruysse et al., 2010)
		Trypsin
		α-chymotrypsin
	Digestion with mucosal peptidases	Mucosal peptidases
Musca domestica	Hydrolysis	Alcalase	Antioxidant	(Wang et al., 2013)
		Flavourzyme
Apis mellifera	Simulated gastrointestinal digestion	Pepsin	ACE inhibition	(Xu & Gao, 2015)
		Trypsin
		α-chymotrypsin
Bombyx mori	Simulated gastrointestinal digestion	Pepsin	ACE inhibition	(Wu et al., 2015)
		Trypsin
		α-chymotrypsin
Bombyx mori	Hydrolysis	Alcalase protease	Antioxidant	(Liu et al., 2017)
		Danisco alkaline protease
	Simulated gastrointestinal digestion	Pepsin
		Trypsin
		Chymotrypsin
Oecophylla smaragdina	Simulated gastrointestinal digestion	Pepsin	ACE inhibition	(Pattarayingsakul et al., 2017)
		Trypsin	Antioxidant
Blaptica dubia	Simulated gastrointestinal digestion	α-amylase	Antioxidant	(Zielińska, Karaś, et al., 2017)
Gromphadorhina portentosa		Pepsin
Locusta migratoria		Pancreatin
Zophobas morio
Amphiacusta annulipes
Gryllodes sigillatus	Heat treatment		Antioxidant	(Zielińska, Baraniak, et al., 2017)
Tenebrio molitor			Anti-inflammatory
Schistocerca gregaria	Simulated gastrointestinal digestion	α-amylase
		Pepsin
		Pancreatin
Gryllodes sigillatus	Hydrolysis	Protamex	DPP-IV inhibition	(Nongonierma et al., 2018)
	Simulated gastrointestinal digestion	Pepsin
		Corolase PP
Gryllodes sigillatus	Hydrolysis	Alcalase	Antioxidant	(Hall et al., 2018)
			ACE inhibition
	Simulated gastrointestinal digestion	Pepsin	DPP-IV inhibition
		Pancreatin
Gryllodes sigillatus	Heat treatment		Antioxidant	(Zielińska et al., 2018)
Tenebrio molitor			Anti-inflammatory
Schistocerca gragaria	Simulated gastrointestinal digestion	α-amylase
		Pepsin
		Pancreatin
Acheta domesticus	Hydrolysis	Protamex	Antioxidant	(Messina et al., 2019)
Tenebrio molitor		Flavourzyme
		Alcalase
Hermetia illucens	Sonication		Antioxidant	(Mintah et al., 2019)
	Hydrolysis	Alkaline protease (Novozymes)
Gryllus bimaculatus	Hydrolysis	Flavourzyme	α-glucosidase inhibition	(Yoon et al., 2019)
Tenebrio molitor		Alcalase	ACE inhibition
Bombyx mori		Neutrase	Anti-inflammatory
		Protamex
Ulomoides dermestoides	Hydrolysis	Aspergillus oryzae protease	Antioxidant	(Flores et al., 2020)
Tenebrio molitor			Antimicrobial
Gryllodes sigillatus	Hydrolysis	Alcalase	DPP-IV inhibition	(Hall & Liceaga, 2020)
	Conventional heating		ACE inhibition
	Microwave radiation
Gryllodes sigillatus	Hydrolysis	Alcalase	ACE inhibition	(Hall et al., 2020)
			Anti-glycemic
	Simulated gastrointestinal digestion	Pepsin	Anti-inflammatory
		Pancreatin
Pterophylla beltrani	Simulated gastrointestinal digestion	Pepsin	ACE inhibition	(Montiel-Aguilar et al., 2020)
		Trypsin	α-amylase inhibition
		Chymotrypsin	Antioxidant
Tenebrio molitor	Hydrolysis	Subtilisin	ACE inhibition	(Pino et al., 2020)
		Trypsin	Antioxidant
		Ficin	DPP-IV inhibition
		Flavourzyme
Tenebrio molitor	Ultrasound	Alcalase	α-glucosidase inhibition	(Rivero-Pino et al., 2020)
	Hydrolysis	Trypsin
Alphitobius diaperinus	Hydrolysis	Alcalase	Antioxidant	(Sousa et al., 2020)
		Corolase	ACE inhibition
			α-glucosidase inhibition
			Antimicrobial
Tenebrio molitor	Extraction of cuticular proteins and non-cuticular proteins		DPP-IV inhibition	(Terán et al., 2020)
	Hydrolysis	Pepsin
		Papain
Tenebrio molitor	Heat treatment		ACE inhibition	(Zielińska et al., 2020)
Schistocerca gregaria			Pancreatic lipase inhibition
Gryllodes sigillatus	Simulated gastrointestinal digestion	Pepsin	α-glucosidase inhibition
		Pancreatin
Gryllus assimilis	Hydrolysis	Flavourzyme	Antioxidant	(de Matos et al., 2021)
		Alcalase
		Neutrase
Allomyrina dichotoma	Hydrolysis	Pepsin	Anti-obesity	(Fan et al., 2021)
Musca domestica		Trypsin
Cetonia pilifera		Neutral protease NP
Tenebrio molitor		Pancreatin
Hermetia illucens		Alphalase TM NP
Bombyx mori		FoodPro alkaline protease
Orthoptera larvae		Promod 278P
Velarifictorus aspersus
Tenebrio molitor	Fermentation with Lactococcus lactis strains	-	Antioxidant	(Mendoza-Salazar et al., 2021)
Sphenarium purpurascens			ACE inhibition
Tenebrio molitor	Hydrolysis	Subtilisin	DPP-IV inhibition	(Rivero-Pino et al., 2021)
		Alcalase	α-glucosidase inhibition
		Trypsin
		Flavourzyme
Gryllus bimaculatus	Fermentation with Leuconostoc mesenteroides, Lactobacillus plantarum and Bacillus amyloliquefaciens strains	-	Antioxidant	(Seong & Kim, 2021)
Bombyx mori	Hydrolysis	Acidic protease	Antioxidant	(Zhang et al., 2021)
		Neutral protease
	Simulated gastrointestinal digestion	Pancreatin
		Chymotrypsin
Gryllus assimilis	Hydrolysis	Flavourzyme	α-amylase inhibition	(de Matos, de Lacerda, Zanetti, & de Castro, 2022)
		Alcalase	α-glucosidase inhibition
		Neutrase	ACE inhibition
Bombyx mori	Hydrolysis	Pepsin	DPP-IV inhibition	(Luo et al., 2022)
Antheraea assamensis	Hydrolysis	Alcalase	ACE inhibition	(Sarkar, Valacchi, & Duary, 2022)
		Flavourzyme	DPP-IV inhibition
		Thermolysin	Antioxidant
		Papain
	Simulated gastrointestinal digestion	Pepsin
		Trypsin
		α-chymotrypsin
References
de Matos, F. M., de Lacerda, J. T. J. G., Zanetti, G., & de Castro, R. J. S. (2022). Production of black cricket protein hydrolysates with α-amylase, α-glucosidase and angiotensin I-converting enzyme inhibitory activities using a mixture of proteases. Biocatalysis and Agricultural Biotechnology, 39, 102276. https://doi.org/10.1016/j.bcab.2022.102276
de Matos, F. M., Novelli, P. K., & de Castro, R. J. S. (2021). Enzymatic hydrolysis of black cricket (Gryllus assimilis) proteins positively affects their antioxidant properties. Journal of Food Science, 86, 571–578. https://doi.org/10.1111/1750-3841.15576
Fan, M., Choi, Y.-J., Tang, Y., Kim, J. H., Kim, B., Lee, B., Bae, S. M., & Kim, E.-K. (2021). Agl9: A novel hepatoprotective peptide from the larvae of edible insects alleviates obesity-induced hepatic inflammation by regulating AMPK/Nrf2 signaling. Foods, 10, 1–14. https://doi.org/10.3390/foods10091973
Flores, D. R., Casados, L. E., Velasco, S. F., Ramírez, A. C., & Velázquez, G. (2020). Comparative study of composition, antioxidant and antimicrobial activity of two adult edible insects from Tenebrionidae family. BMC Chemistry, 14, 1–9. https://doi.org/10.1186/s13065-020-00707-0
Hall, F., Johnson, P. E., & Liceaga, A. (2018). Effect of enzymatic hydrolysis on bioactive properties and allergenicity of cricket (Gryllodes sigillatus) protein. Food Chemistry, 262, 39–47. https://doi.org/10.1016/j.foodchem.2018.04.058
Hall, F., & Liceaga, A. (2020). Effect of microwave-assisted enzymatic hydrolysis of cricket (Gryllodes sigillatus) protein on ACE and DPP-IV inhibition and tropomyosin-IgG binding. Journal of Functional Foods, 64, 103634. https://doi.org/10.1016/j.jff.2019.103634
Hall, F., Reddivari, L., & Liceaga, A. M. (2020). Identification and characterization of edible cricket peptides on hypertensive and glycemic in vitro inhibition and their anti-inflammatory activity on raw 264.7 macrophage cells. Nutrients, 12, 1–16. https://doi.org/10.3390/nu12113588
Liu, Y., Wan, S., Liu, J., Zou, Y., & Liao, S. (2017). Antioxidant activity and stability study of peptides from enzymatically hydrolyzed male silkmoth. Journal of Food Processing and Preservation, 41, e13081. https://doi.org/10.1111/jfpp.13081
Luo, F., Fu, Y., Ma, L., Dai, H., Wang, H., Chen, H., Zhu, H., Yu, Y., Hou, Y., & Zhang, Y. (2022). Exploration of dipeptidyl peptidase-IV (DPP-IV) inhibitory peptides from silkworm pupae (Bombyx mori) proteins based on in silico and in vitro assessments. Journal of Agricultural and Food Chemistry, 70, 3862–3871. https://doi.org/10.1021/acs.jafc.1c08225
Mendoza-Salazar, A., Santiago-López, L., Torres-Llanez, M. J., Hernández-Mendoza, A., Vallejo-Cordoba, B., Liceaga, A. M., & González-Córdova, A. F. (2021). In vitro antioxidant and antihypertensive activity of edible insects flours (Mealworm and grasshopper) fermented with Lactococcus lactis strains. Fermentation, 7, 153. https://doi.org/10.3390/FERMENTATION7030153
Messina, C. M., Gaglio, R., Morghese, M., Tolone, M., Arena, R., Moschetti, G., Santulli, A., Francesca, N., & Settanni, L. (2019). Microbiological profile and bioactive properties of insect powders used in food and feed formulations. Foods, 8, 1–16. https://doi.org/10.3390/foods8090400
Mintah, B. K., He, R., Dabbour, M., Xiang, J., Agyekum, A. A., & Ma, H. (2019). Techno-functional attribute and antioxidative capacity of edible insect protein preparations and hydrolysates thereof: Effect of multiple mode sonochemical action. Ultrasonics - Sonochemistry, 58, 104676. https://doi.org/10.1016/j.ultsonch.2019.104676
Montiel-Aguilar, L. J., Torres-Castillo, J. A., Rodríguez-Servin, R., López-Flores, A. B., Aguirre-Arzola, V. E., Méndez-Zamora, G., & Sinagawa-García, S. R. (2020). Nutraceutical effects of bioactive peptides obtained from Pterophylla beltrani (Bolivar & Bolivar) protein isolates. Journal of Asia-Pacific Entomology, 23, 756–761. https://doi.org/10.1016/j.aspen.2020.06.006
Nongonierma, A. B., Lamoureux, C., & FitzGerald, R. J. (2018). Generation of dipeptidyl peptidase IV (DPP-IV) inhibitory peptides during the enzymatic hydrolysis of tropical banded cricket (Gryllodes sigillatus) proteins. Food and Function, 9, 407–416. https://doi.org/10.1039/c7fo01568b
Pattarayingsakul, W., Nilavongse, A., Reamtong, O., Chittavanich, P., Mungsantisuk, I., Mathong, Y., Prasitwuttisak, W., & Panbangred, W. (2017). Angiotensin-converting enzyme inhibitory and antioxidant peptides from digestion of larvae and pupae of Asian weaver ant, Oecophylla smaragdina, Fabricius. Journal of the Science of Food and Agriculture, 97, 3133–3140. https://doi.org/10.1002/jsfa.8155
Pino, F. R., Gálvez, R. P., Carpio, F. J. E., & Guadix, E. M. (2020). Evaluation of Tenebrio molitor protein as a source of peptides for modulating physiological processes. Food and Function, 11, 4376–4386. https://doi.org/10.1039/d0fo00734j
Rivero-Pino, F., Espejo-Carpio, F. J., Pérez-Gálvez, R., Guadix, A., & Guadix, E. M. (2020). Effect of ultrasound pretreatment and sequential hydrolysis on the production of Tenebrio molitor antidiabetic peptides. Food and Bioproducts Processing, 123, 217–224. https://doi.org/10.1016/j.fbp.2020.07.003
Rivero-Pino, F., Guadix, A., & Guadix, E. M. (2021). Identification of novel dipeptidyl peptidase IV and α-glucosidase inhibitory peptides from Tenebrio molitor. Food & Function Function, 12, 873–880. https://doi.org/10.1039/d0fo02696d
Sarkar, P., Valacchi, G., & Duary, R. K. (2022). Proteome composition and profiling of bioactive peptides of edible Antheraea assamensis pupae by sequential enzymatic digestion and kinetic modeling of in vitro gastrointestinal digestion. European Food Research and Technology, 248, 357–379. https://doi.org/10.1007/s00217-021-03882-z
Seong, H.-Y., & Kim, M. (2021). Enhanced protein quality and antioxidant activity of fermented Brown rice with Gryllus bimaculatus. LWT, 150, 111948. https://doi.org/10.1016/j.lwt.2021.111948
Sousa, P., Borges, S., & Pintado, M. (2020). Enzymatic hydrolysis of insect: Alphitobius diaperinus towards the development of bioactive peptide hydrolysates. Food and Function, 11, 3539–3548. https://doi.org/10.1039/d0fo00188k
Terán, I. D., Imai, K., Lacroix, I. M. E., Fogliano, V., & Udenigwe, C. C. (2020). Bioinformatics of edible yellow mealworm (Tenebrio molitor) proteome reveal the cuticular proteins as promising precursors of dipeptidyl peptidase-IV inhibitors. Journal of Food Biochemistry, 44, e13121. https://doi.org/10.1111/jfbc.13121
Vercruysse, L., Camp, J. Van, Morel, N., Rougé, P., Herregods, G., & Smagghe, G. (2010). Ala-Val-Phe and Val-Phe: ACE inhibitory peptides derived from insect protein with antihypertensive activity in spontaneously hypertensive rats. Peptides, 31, 482–488. https://doi.org/10.1016/j.peptides.2009.05.029
Vercruysse, L., Smagghe, G., Beckers, T., & Camp, J. Van. (2009). Antioxidative and ACE inhibitory activities in enzymatic hydrolysates of the cotton leafworm, Spodoptera littoralis. Food Chemistry, 114, 38–43. https://doi.org/10.1016/j.foodchem.2008.09.011
Vercruysse, L., Smagghe, G., Matsui, T., & Camp, J. Van. (2008). Purification and identification of an angiotensin I converting enzyme (ACE) inhibitory peptide from the gastrointestinal hydrolysate of the cotton leafworm, Spodoptera littoralis. Process Biochemistry, 43, 900–904. https://doi.org/10.1016/j.procbio.2008.04.014
Wang, J., Wang, Y., Dang, X., Zheng, X., & Zhang, W. (2013). Housefly larvae hydrolysate: Orthogonal optimization of hydrolysis, antioxidant activity, amino acid composition and functional properties. BMC Research Notes, 6, 2–10. https://doi.org/10.1186/1756-0500-6-197
Wu, Q., Jia, J., Yan, H., Du, J., & Gui, Z. (2015). A novel angiotensin-I converting enzyme (ACE) inhibitory peptide from gastrointestinal protease hydrolysate of silkworm pupa (Bombyx mori) protein : Biochemical characterization and molecular docking study. Peptides, 68, 17–24. https://doi.org/10.1016/j.peptides.2014.07.026
Xu, X., & Gao, Y. (2015). Purification and identification of angiotensin I-converting enzyme-inhibitory peptides from apalbumin 2 during simulated gastrointestinal digestion. Journal of the Science of Food and Agriculture, 95, 906–914. https://doi.org/10.1002/jsfa.6755
Yoon, S., Wong, N. A. K., Chae, M., & Auh, J.-H. (2019). Comparative characterization of protein hydrolysates from three edible insects: Mealworm larvae, adult crickets, and silkworm pupae. Foods, 8, 563. https://doi.org/10.3390/foods8110563
Zhang, Y., Wang, J., Zhu, Z., Li, X., Sun, S., Wang, W., & Sadiq, F. A. (2021). Identification and characterization of two novel antioxidant peptides from silkworm pupae protein hydrolysates. European Food Research and Technology, 247, 343–352. https://doi.org/10.1007/s00217-020-03626-5
Zielińska, E., Baraniak, B., & Karaś, M. (2017). Antioxidant and anti-inflammatory activities of hydrolysates and peptide fractions obtained by enzymatic hydrolysis of selected heat-treated edible insects. Nutrients, 9, 1–14. https://doi.org/10.3390/nu9090970
Zielińska, E., Baraniak, B., & Karaś, M. (2018). Identification of antioxidant and anti-inflammatory peptides obtained by simulated gastrointestinal digestion of three edible insects species (Gryllodes sigillatus, Tenebrio molitor, Schistocerca gragaria). International Journal of Food Science and Technology, 53, 2542–2551. https://doi.org/10.1111/ijfs.13848
Zielińska, E., Karaś, M., Baraniak, B., & Jakubczyk, A. (2020). Evaluation of ACE, α-glucosidase, and lipase inhibitory activities of peptides obtained by in vitro digestion of selected species of edible insects. European Food Research and Technology, 246, 1361–1369. https://doi.org/10.1007/s00217-020-03495-y
Zielińska, E., Karaś, M., & Jakubczyk, A. (2017). Antioxidant activity of predigested protein obtained from a range of farmed edible insects. International Journal of Food Science and Technology, 52, 306–312. https://doi.org/10.1111/ijfs.13282
