# Supplementary material for: Insects as a sustainable source of emerging proteins and their processing to obtain bioactive compounds: an updated review
Source: Royal Society of Chemistry journal article supplement (doi:10.1039/d3fb00097d), 2023-11-07
Supplement: d3fb00097d2.xlsx [file d3fb00097d2.xlsx]

## Sheet: Planilha1
Table S2. Studies from the last 5 years which address the formation of Maillard reaction products from the interaction of protein hydrolysates with different saccharides and under different reaction conditions.
Hydrolysate / Enzyme	Saccharides / Ratio S:H	Treatment condition	Effects	Reference
Half-fin anchovy (Setipinna taty) hydrolysate / Pepsin	Glucose / 3:5 (w/w)	120 °C for 100 min	The inhibition rate against E. coli cells was doubled after the MR. The antimicrobial activity showed a positive correlation with the presence of soluble melanoidins (< 3.5 kDa), specifically with the fructosamine content.	(Song et al., 2019)
Crab shell hydrolysate / Protamex and Flavourzyme	Fructose / 1:2, 1:1, 2:1, and 4:1 (w/w)	100 °C for 60 min	The increase of antioxidant and antibacterial activities was a positive correlation with the increase of fructose concentration and reaction pH. The active components of the MRPs were mainly found in the 2–5 kDa fractions. The antioxidant properties of the MRPs were higher than that of ascorbic acid. The antibacterial activity against E. coli and V. parahaemolyticus was similar to the 20 μg/mL am…	(Jiang et al., 2018)
Shrimp (Penaeus vannamei) hydrolysate / Alkaline protease	Glucose / 1:2 (v:w)	100 °C for until 180 min	After MR, the prolyl endopeptidase-inhibiting activity (25.3%) was lost. The antioxidant properties increased, which was correlated with the formation of fluorescent intermediates and low MW melanoidins.	(Gómez-Estaca et al., 2021)
Sea cucumber (Cucumaria frondosa) hydrolysate / Protamex	Glucose and xylooligosaccharide / 5:1 (w/w)	115 °C for 20 min	MR enhanced antioxidant activity of the hydrolysate, which attenuated oxidative stress in aging mice. The glycation did not reduce in vitro digestibility of the sample.	(F. Chen et al., 2021)
Hydrolysates of sweet potato protein, potato protein, soy protein, egg white protein, and whey protein / Alcalase and Flavourzyme	Xylose / 3:5 (w/w)	120 °C for 120 min	The MR increased the oxygen radical absorbance capacity (ORAC) in all samples, but mainly for whey and sweet potato protein hydrolysates. This increase was attributed to melanoidins generated at the later stage of MR and the generation of other peptides. MR also conferred an increase of umami attributes and reduction of bitterness for all MRPs.	(Habinshuti et al., 2022)
Bighead carp (Hypophthalmichthys nobilis) meat hydrolysates / Papain and Flavourzyme	Galactose and galacto-oligosaccharides (2:1, 1:1, and 1:2 (w/w)	90 °C for 2 and 4 h	The DPPH scavenging activity and the reducing power increased after heating. The maximum DPPH scavenging activity (35.1) and reducing power (274 μmol TE/g protein) were observed in the samples treated with galactose, with these values reached after heating for 4 h using a saccharide: hydrolysate ratio of 2:1.	(Liang et al., 2022)
Camellia (Camellia oleifera) seed hydrolysate / Alkaline protease and Flavourzyme	Glucose, fructose, xylose, and ribose / 1:2 (w/w)	110 ℃ for 90 min	The antioxidant activity of camellia seed meal hydrolysate was enhanced after MR, mainly when reacted with ribose (an increase of about 45% in the DPPH radical scavenging activity, 30% in the ABTS radical scavenging activity, and 60% hydroxyl radical scavenging ability.	(Ni et al., 2021)
Yesso scallop (Patinopecten yessoensis) female gonad hydrolysate / Alcalase	Ribose / 2:1 (w/w)	95 °C for 12 h	The MRPs extracted by methanol and ethanol showed the lowest IC50 values for the antioxidant activities, which could be due the formation of reductones, an aromatic compound more soluble in organic reagents. The hydrolysate exhibited antimicrobial activity against E. coli, before and after MR. The more significant effect was observed in the MRPs methanol extracts, which exhibited a higher zone of…	(J. R. Han et al., 2021)
Sweet potato protein hydrolysate / Alcalase and Flavourzyme / Conventional and ultrasound-assisted enzymatic hydrolysis	Arabinose, xylose, galactose and glucose / 3:5 (w/w)	120 °C for 120 min	The ultrasonic treatment increased approximately 13% oxygen radical absorbance capacity of the sweet potato protein hydrolysate. This property was 40% higher after the Maillard reaction with addition of xylose.	(Habinshuti, Zhang, et al., 2021)
Sweet potato protein hydrolysates / Alcalase and Flavourzyme / Energy-divergent/gathered ultrasound/ultrasound-microwave treatments	Xylose / 3:5 (w/w)	120 °C for 120 min	The ultrasonic treatments enhanced the Maillard reaction progress of the hydrolysates. The highest ORAC value (92.10 µg TE/mL) and highest percentages in lower MW fractions of 200–3,000 Da were found in the MRPs of the hydrolysate treated with energy-gathered ultrasound.	(Habinshuti, Mu, et al., 2021)
Rice protein hydrolysates / Trypsin, Neutrase, and Flavourzyme	Glucose / 1:1 (w/w)	100 °C for 30, 60, 90, 120, 150 and 180 min	After MR, the sample hydrolyzed with Trypsin had the best DPPH radical scavenging activity (31.43–46.75%). The maximum activity was obtained after 60 min of reaction.	(Xiao et al., 2021)
Crocodile meat hydrolysates / Trypsin	Xylose / 2:1 (w/w)	100 °C for 3.2 h	The MRPs exhibited better antioxidant ability than the hydrolysates, with IC50 of 227 μg/mL, 24 μg/mL and 1.72 mg/mL to DPPH, ABTS and hydroxyl scavenging activities. The MR promoted an increase of about 80% in the DPPH radical scavenging activity. MRPs also exhibited outstanding anti-aging capacities in Drosophila models.	(Li et al., 2021)
Corn peptide hydrolysate / Alcalase and Flavourzyme	Xylose / 1/10 (w/w)	100, 110, 120, 130 and 140 °C for 60, 90, 120, 150 and 180 min	During the increase of the MR temperature, the minimum inhibitory concentration of S. aureus and E. coli ranged from 140 to 8 mg/mL, and from 280 to 30 mg/mL, respectively. The bacterial growth inhibition activity was associated to the higher contents of α-dicarbonyl compounds in the MRPs, mainly glyoxal and methylglyoxal. DPPH radical scavenging activity and reducing power of MRPs also increased…	(Feng et al., 2021)
Chicken liver protein hydrolysate / Trypsin	Xylose / 1:1 (w/w)	120 °C for 90 min	The samples had their antimicrobial properties significatively improved after hydrolysis. The Maillard reaction improved the inhibiting growth of S. saprophyticus. After MR, the hydrolysates ultrasound treated shown the highest antimicrobial activities. The inhibitory effect of the MRPs on gram-positive bacteria was significantly higher than that on gram-negative bacteria.	(X. Chen et al., 2021)
Oyster meat hydrolysate / Neutrase	Glucose / 2:1 (w/w)	115 °C for 35 min	At 60 mg/ml concentration, the gap between the antioxidative activity of the oyster meat hydrolysate MRPs and oyster hydrolysates grew to approximately 40%, 30%, and 20% for lipid peroxidation, and radical scavenging activity of DPPH and hydroxyl, respectively. Two groups of components that increased the most after the Maillard reaction was acids (from 22.45% to 37.77%) and phenols (from 0% to 9.…	(He et al., 2020)
Chicken liver protein hydrolysates / Trypsin	D-xylose, sucrose, D-galactose, D-fructose, glucose, and maltose / 1:1 (w/w)	90 - 140 °C for 50 - 100 min	The optimal MR condition was achieved with the sugar xylose, a reaction temperature of 138.78 °C, and a reaction time of 93.14 min. The reducing power, DPPH radical scavenging and hydroxyl radical scavenging of the MRPs were significantly higher (P < 0.01) than for the chicken liver protein, the hydrolysate, and the sonicated hydrolysate.	(Xiong et al., 2020)
Labeo rohita head hydrolysate / Protamex	Glucose / 1:4 (w/w)	120 °C for 120 min	The antioxidant properties of fish protein without sugar decreased significantly after heating, which could be related to the thermal breakdown of antioxidant peptides. The ultrasound pre-treated and non-heated samples had their antioxidant properties gradually decreased with an increase in the value of sonication amplitude. However, a significant increase in bioactivity was observed after heatin…	(Siewe et al., 2020)
Bovine bone marrow extract / Protamex and Flavourzyme	Xylose / 1:2 (w/w)	120 °C for 60 min	The MR increased by approximately 40 % and 45% the DPPH scavenging activity of the extract, and the extract hydrolysate, respectively. Similar effects were observed for ABTS radical scavenging activity, ferric reducing antioxidant power, reducing power, hydroxyl radical scavenging activity, and ACE inhibitory activity. For all tests, the highest activity was obtained for the MRPs of the hydrolyze…	(Begum et al., 2020)
Whey protein hydrolysates / Alcalase	Galactose / 1:1 (w/w)	95 °C for 0 - 4 h	The highest antioxidant activities were obtained for the MRPs of the proteins and the hydrolysates. The MR increased the reducing power, ABTS radical scavenging activity, and hydroxyl radical scavenging ability of the hydrolysates in 9.8, 3.5, and 5.2 folds.	(X. Zhang et al., 2020)
Sea cucumber (Stichopus japonicus) gut hydrolysates / Neutrase	Ribose / 2:1 (w/w)	95 °C for 12 h	The antioxidant activity of the MRPs was associated with the formation of melanoidins, reductones, and heterocyclic compounds. The activity of reductones has been attributed to the effect of breaking the radical chain by the donation of a hydrogen atom. After the extractions with methanol, the IC50 of the MRPs, for DPPH and ABTS radical scavenging activities, and for linoleic acid peroxidation in…	(Y.-T. Han et al., 2019)
Gelatin hydrolysates from fish scales / Papain	D-ribose, D-xylose, or D-glucose / 2:1 (w/w)	95 °C for 0 - 5 h	After the MR, the DPPH and ABTS radical scavenging activities, and the reducing power of the hydrolysate increased by approximately 90%, 60%, and 90%, respectively. The use of ribose promoted the most significant improvement in antioxidant activity. After simulated digestion, the MRPs retained about 55%, 90%, and 67% of these activities.	(K. Chen, Yang, et al., 2019)
Mussel protein hydrolysate / Papain	Glucose and Xylose (1:2) / 1:33 (w/w)	115 °C for 2 h	The DPPH scavenging activity and reducing power of MRPs were enhanced gradually with the prolonging of reaction time. For the MRPs that receive the ultrasonic-assisted heat treatment, these activities increased by about 5.5 and 13 folds. It was suggested that the ultrasonic pretreatment can promote glucose isomerization into fructose, producing MRPs with better antioxidant activity.	(Dong et al., 2019)
Sunflower, soybean and corn meal hydrolysates / Alcalase and Flavourzyme	D-xylose / 1:100 (w/w)	120 °C for 2 h	Only MRPSs of sunflower hydrolysates exhibited significant minimum inhibitory concentration against E. coli and Staphylococcus aureus (86 and 70 mg/mL, respectively). These antimicrobial activities were attributed to the high percentage of alcohols and carboxylic acids in the sample. This sample also showed the highest antioxidant capacity reducing the DPPH radicals (91.95%) and reducing power.	(Habinshuti et al., 2019)
Scallop (Patinopecten yessoensis) gonad hydrolysate / Neutrase	Rhamnose, glucose, arabinose, xylose, or ribose/ 1:4 (w/w)	95 °C for 2 h	Ribose was the most reactive sugar for the Maillard reaction. The high ribose reactivity was associated to the acyclic form of the ribose. The adequate ratio of hydrolysate and ribose identified was 1:2. The increase in pH value from 4 to 8 led to an enhancement of DPPH radical scavenging activity. The MRPs exhibited DPPH radical scavenging activity and reducing power with IC50 and AC0.5 values o…	(Jin et al., 2018)
Bovine casein hydrolysate / AS1.398 neutral protease	Xylose / 1:1 (w/w)	100 °C for 0 - 8 h	The DPPH free radical scavenging capacity of the hydrolysate increased 22-folders after MR (91.98% with 8 h of thermal treatment). The ferrous reducing activity was increased by about 7-folders in MRPs. This improvement was attributed to formed colored melanoidins from aldol condensation and aldehyde–amine polymerization in the final stage.	(K. Chen, Zhao, et al., 2019)
Peanut meal hydrolysate / Fermentation with Bacillus subtilis and protease, α-amylase and cellulose /	Xylose / 1:100 (w/v)	115 °C for 35 min	The DPPH radical scavenging activity, hydroxyl radical scavenging activity, and lipid peroxidation of hydrolysates derived from peanut meal increased after the Maillard reaction. At a concentration of 3 mg/mL, the DPPH radical scavenging increased from approximately 20% to approximately 60% after MR. The GC-MS analysis demonstrated an increase in the percentage of anti-oxidative compounds, mainly…	(Qinzhu et al., 2018)
Anchovy protein hydrolysate / Alcalase, papain and pancreatin	D-ribose / 3:10 (w/w)	110 °C for 30 min	After MR, the ABTS scavenging activity and acetylcholinesterase inhibitory rate of the hydrolysate increased by about 55% and 47%, respectively. The GC-MS analysis has shown that methanethiol, dimethyl disulfide, furfural, 3-methylthiopropionaldehyde, pyrrole-2-carboxaldehyde and other components were only identified in the MRPs.	(Zhao et al., 2018)
Soybean meal hydrolysates / Alkaline protease and Flavourzyme	D-xylose / 2:5 (w/w)	120 °C for 2 h	The antioxidant activities of all samples were increased after MR. The DPPH radical-scavenging activity of MRPs of MW less than 1 kDa was markedly increased by 3.2 folders compared to the fraction no heat treated. The volatile compounds and low molecular weight heterocyclic compounds were attributed to the increase in antioxidant activity of this sample.	(Yu et al., 2018)
Half-fin anchovy hydrolysates / Pepsin	Glucose 1:33 (w/v)	120 °C for 100 min	The products of MR induced significant hydrogen peroxide production in E. coli after 3 h of incubation, which contributed to the antibacterial activity by inducing oxidative stress and subsequent cellular damage. The administration of MRPs promoted an increase in superoxide dismutase and glutathione peroxidase, as well as decreased lipid peroxidation content, especially in the liver, generating a…	(Song et al., 2018)
Morchella (Morchella esculenta) protein hydrolysate / Papain	Xylose / 3.7:1 (w/w)	100 °C for 60 min	The hydrolysate glycosylated by MR exhibited the highest antioxidant activity. Its total antioxidant activity and reducing power were 7.77 and 17.03 times those of the sample only hydrolyzed, respectively. The nitrite and H2O2 scavenging activities were 11.70 and 2.09 times those of the hydrolysate. The DPPH, ABTS, and superoxide anion radical scavenging activities of the MRPs were 426.29%, 37.33…	(Q. Zhang et al., 2018)
References
Begum, N., Raza, A., Shen, D., Song, H., Zhang, Y., Zhang, L., & Liu, P. (2020). Sensory attribute and antioxidant capacity of Maillard reaction products from enzymatic hydrolysate of bovine bone marrow extract. Journal of Food Science and Technology, 57, 1786–1797. https://doi.org/10.1007/s13197-019-04212-8
Chen, F., Lin, L., Zhao, M., & Zhu, Q. (2021). Modification of Cucumaria frondosa hydrolysate through Maillard reaction for sea cucumber peptide based-beverage. LWT, 136, 110329. https://doi.org/10.1016/j.lwt.2020.110329
Chen, K., Yang, X., Huang, Z., Jia, S., Zhang, Y., Shi, J., Hong, H., Feng, L., & Luo, Y. (2019). Modification of gelatin hydrolysates from grass carp (Ctenopharyngodon idellus) scales by Maillard reaction: Antioxidant activity and volatile compounds. Food Chemistry, 295, 569–578. https://doi.org/10.1016/j.foodchem.2019.05.156
Chen, K., Zhao, J., Shi, X., Abdul, Q., & Jiang, Z. (2019). Characterization and antioxidant activity of products derived from xylose–bovine casein hydrolysate Maillard reaction: Impact of reaction time. Foods, 8, 242. https://doi.org/10.3390/foods8070242
Chen, X., Jiang, D., Xu, P., Geng, Z., Xiong, G., Zou, Y., Wang, D., & Xu, W. (2021). Structural and antimicrobial properties of Maillard reaction products in chicken liver protein hydrolysate after sonication. Food Chemistry, 343, 128417. https://doi.org/10.1016/j.foodchem.2020.128417
Dong, Z. Y., Liu, W., Zhou, Y. J., Ren, H., Li, M. Y., & Liu, Y. (2019). Effects of ultrasonic treatment on Maillard reaction and product characteristics of enzymatic hydrolysate derived from mussel meat. Journal of Food Process Engineering, 42, 1–11. https://doi.org/10.1111/jfpe.13206
Feng, T., Zhou, Y., Wang, X., Wang, X., & Xia, S. (2021). α-Dicarbonyl compounds related to antimicrobial and antioxidant activity of Maillard reaction products derived from xylose, cysteine and corn peptide hydrolysate. Food Bioscience, 41, 100951. https://doi.org/10.1016/j.fbio.2021.100951
Gómez-Estaca, J., Albertos, I., Martín-Diana, A. B., Rico, D., & Martínez-Álvarez, Ó. (2021). Protein hydrolysis and glycosylation as strategies to produce bioactive ingredients from unmarketable prawns. Foods, 10, 2844. https://doi.org/10.3390/foods10112844
Habinshuti, I., Chen, X., Yu, J., Mukeshimana, O., Duhoranimana, E., Karangwa, E., Muhoza, B., Zhang, M., Xia, S., & Zhang, X. (2019). Antimicrobial, antioxidant and sensory properties of Maillard reaction products (MRPs) derived from sunflower, soybean and corn meal hydrolysates. LWT - Food Science and Technology, 101, 694–702. https://doi.org/10.1016/j.lwt.2018.11.083
Habinshuti, I., Mu, T.-H., & Zhang, M. (2021). Structural, antioxidant, aroma, and sensory characteristics of Maillard reaction products from sweet potato protein hydrolysates as influenced by different ultrasound-assisted enzymatic treatments. Food Chemistry, 361, 130090. https://doi.org/10.1016/j.foodchem.2021.130090
Habinshuti, I., Zhang, M., Sun, H. N., & Mu, T. H. (2021). Effects of ultrasound-assisted enzymatic hydrolysis and monosaccharides on structural, antioxidant and flavour characteristics of Maillard reaction products from sweet potato protein hydrolysates. International Journal of Food Science and Technology, 56, 6086–6099. https://doi.org/10.1111/ijfs.15249
Habinshuti, I., Zhang, M., Sun, H. N., & Mu, T. H. (2022). Comparative study of antioxidant and flavour characteristics of Maillard reaction products from five types of protein hydrolysates. International Journal of Food Science and Technology, 57, 3652–3664. https://doi.org/10.1111/ijfs.15689
Han, J. R., Han, Y. T., Li, X. W., Gu, Q., Li, P., & Zhu, B. W. (2021). Antioxidant activity of Yesso scallop (Patinopecten yessoensis) female gonad hydrolysates-ribose Maillard reaction products extracted with organic reagents, before and after in vitro digestion. Food Bioscience, 43, 101262. https://doi.org/10.1016/j.fbio.2021.101262
Han, Y.-T., Zhao, C.-C., Han, J.-R., Yan, J.-N., Du, Y.-N., Shang, W.-H., & Wu, H.-T. (2019). Antioxidant activity of sea cucumber (Stichopus japonicus) gut hydrolysates-ribose Maillard reaction products derived from organic reagent extraction. Journal of Food Measurement and Characterization, 13, 2790–2797. https://doi.org/10.1007/s11694-019-00199-0
He, S., Chen, Y., Brennan, C., Young, D. J., Chang, K., Wadewitz, P., Zeng, Q., & Yuan, Y. (2020). Antioxidative activity of oyster protein hydrolysates Maillard reaction products. Food Science and Nutrition, 8, 3274–3286. https://doi.org/10.1002/fsn3.1605
Jiang, W., Liu, Y., Yang, X., & Hu, S. (2018). Antioxidant and antibacterial activities of modified crab shell bioactive peptides by Maillard reaction. International Journal of Food Properties, 21, 2730–2743. https://doi.org/10.1080/10942912.2018.1561463
Jin, W.-G., Du, Y.-N., Pei, J.-J., Zhao, J., Tang, Y., Shang, W.-H., Wu, H.-T., & Zhu, B.-W. (2018). Characterization and antioxidant activity of Maillard reaction products from a scallop (Patinopecten yessoensis) gonad hydrolysates-sugar model system. Journal of Food Measurement and Characterization, 12, 2883–2891. https://doi.org/10.1007/s11694-018-9903-4
Li, Y., Hu, D., Huang, J., & Wang, S. (2021). Glycated peptides obtained from cultured crocodile meat hydrolysates via Maillard reaction and the anti-aging effects on Drosophila in vivo. Food and Chemical Toxicology, 155, 112376. https://doi.org/10.1016/j.fct.2021.112376
Liang, Y., Wang, K., Yang, Q., Zhang, L., Shi, C., Tavakoli, S., Tan, Y., Luo, Y., & Hong, H. (2022). The antioxidant activities and flavor properties of glycated bighead carp meat hydrolysates produced with galactose and galacto-oligosaccharides. LWT, 158, 113104. https://doi.org/10.1016/j.lwt.2022.113104
Ni, Z. J., Liu, X., Xia, B., Hu, L. T., Thakur, K., & Wei, Z. J. (2021). Effects of sugars on the flavor and antioxidant properties of the Maillard reaction products of camellia seed meals. Food Chemistry: X, 11, 100127. https://doi.org/10.1016/j.fochx.2021.100127
Qinzhu, Z., Yan-ling, C., Dong-xiao, S., Tian, B., Yang, Y., & Shan, H. (2018). Process optimization and anti-oxidative activity of peanut meal Maillard reaction products. LWT - Food Science and Technology, 97, 573–580. https://doi.org/10.1016/j.lwt.2018.07.025
Siewe, F. B., Kudre, T. G., Bettadaiah, B. K., & Narayan, B. (2020). Effects of ultrasound-assisted heating on aroma profile, peptide structure, peptide molecular weight, antioxidant activities and sensory characteristics of natural fish flavouring. Ultrasonics - Sonochemistry, 65, 105055. https://doi.org/10.1016/j.ultsonch.2020.105055
Song, R., Jia, Z., Shi, Q., Wei, R., & Dong, S. (2019). Identification of bioactive peptides from half-fin anchovy (Setipinna taty) hydrolysates and further modification using Maillard reaction to improve antibacterial activities. Journal of Functional Foods, 58, 161–170. https://doi.org/10.1016/j.jff.2019.05.001
Song, R., Shi, Q., Yang, P., & Wei, R. (2018). In vitro membrane damage induced by half-fin anchovy hydrolysates/glucose Maillard reaction products and the effects on oxidative status in vivo. Food and Function, 9, 785–796. https://doi.org/10.1039/c7fo01459g
Xiao, Q., Woo, M. W., Hu, J., Xiong, H., & Zhao, Q. (2021). The role of heating time on the characteristics, functional properties and antioxidant activity of enzyme-hydrolyzed rice proteins-glucose Maillard reaction products. Food Bioscience, 43, 101225. https://doi.org/10.1016/j.fbio.2021.101225
Xiong, G. Y., Chen, X., Zhang, X. X., Miao, Y., Zou, Y., Wang, D. Y., & Xu, W. M. (2020). Process optimization and the relationship between the reaction degree and the antioxidant activity of Maillard reaction products of chicken liver protein hydrolysates. Poultry Science, 99, 3733–3741. https://doi.org/10.1016/j.psj.2020.03.027
Yu, M., He, S., Tang, M., Zhang, Z., Zhu, Y., & Sun, H. (2018). Antioxidant activity and sensory characteristics of Maillard reaction products derived from different peptide fractions of soybean meal hydrolysate. Food Chemistry, 243, 249–257. https://doi.org/10.1016/j.foodchem.2017.09.139
Zhang, Q., Wu, C., Fan, G., Li, T., & Sun, Y. (2018). Improvement of antioxidant activity of Morchella esculenta protein hydrolysate by optimized glycosylation reaction. CYTA - Journal of Food, 16, 238–246. https://doi.org/10.1080/19476337.2017.1389989
Zhang, X., Li, X., Liu, L., Wang, L., Massounga Bora, A. F., & Du, L. (2020). Covalent conjugation of whey protein isolate hydrolysates and galactose through Maillard reaction to improve the functional properties and antioxidant activity. International Dairy Journal, 102, 104584. https://doi.org/10.1016/j.idairyj.2019.104584
Zhao, T., Zhang, Q., Wang, S., Qiu, C., Liu, Y., Su, G., & Zhao, M. (2018). Effects of Maillard reaction on bioactivities promotion of anchovy protein hydrolysate: The key role of MRPs and newly formed peptides with basic and aromatic amino acids. LWT - Food Science and Technology, 97, 245–253. https://doi.org/10.1016/j.lwt.2018.06.051
